# Supplementary material for: Drinking Habits and Physical Activity Interact and Attenuate Obesity Predisposition of TMEM18 Polymorphisms Carriers
Source: MDPI journal article supplement (doi:10.3390/nu15020266), 2023-01-04
Supplement: s1 [file s1]

Table S1. Hardy-Weinberg equilibrium for TMEM18 studied SNPs

| SNP                    | Allele |    | Genotype frequency | MAF (%) | $\chi^2$ | <i>p</i> -Value |
|------------------------|--------|----|--------------------|---------|----------|-----------------|
| rs939583<br>(n=3091)   | C>T    | CC | 169 (5.5%)         | 77.35   | 0.179    | 0.915           |
|                        |        | TC | 1062 (34.4%)       |         |          |                 |
|                        |        | TT | 1860 (60.2%)       |         |          |                 |
| rs1879523<br>(n=3091)  | A>T    | AA | 1460 (47.2%)       | 31.1    | 0.042    | 0.979           |
|                        |        | AT | 1341 (43.4%)       |         |          |                 |
|                        |        | TT | 290 (9.4%)         |         |          |                 |
| rs2867125<br>(n=3090)  | T>C    | TT | 168 (5.4%)         | 77.35   | 0.007    | 0.996           |
|                        |        | CT | 1064 (34.4%)       |         |          |                 |
|                        |        | CC | 1858 (60.1%)       |         |          |                 |
| rs2903492<br>(n=3090)  | G>A    | GG | 167 (5.4%)         | 77.24   | 0.006    | 0.997           |
|                        |        | AG | 1068 (34.6%)       |         |          |                 |
|                        |        | AA | 1855 (60.0%)       |         |          |                 |
| rs4854344<br>(n=3085)  | G>T    | GG | 175 (5.7%)         | 76.5    | 0.035    | 0.983           |
|                        |        | GT | 1100 (35.6%)       |         |          |                 |
|                        |        | TT | 1810 (58.6%)       |         |          |                 |
| rs6548238<br>(n=3091)  | T>C    | TT | 170 (5.5%)         | 77.11   | 0.109    | 0.947           |
|                        |        | CT | 1075 (34.8%)       |         |          |                 |
|                        |        | CC | 1846 (59.7%)       |         |          |                 |
| rs10189761<br>(n=3082) | T>A    | TT | 177 (5.6%)         | 76.56   | 0.072    | 0.965           |
|                        |        | AT | 1091 (35.3%)       |         |          |                 |
|                        |        | AA | 1814 (58.7%)       |         |          |                 |
| rs13021737<br>(n=3090) | A>G    | AA | 170 (5.5%)         | 77.06   | 0.107    | 0.948           |
|                        |        | AG | 1074 (34.7%)       |         |          |                 |
|                        |        | GG | 1845 (59.7%)       |         |          |                 |
| rs7561317<br>(n=3091)  | A>G    | AA | 175 (5.5%)         | 76.56   | 0.041    | 0.980           |
|                        |        | AG | 1099 (35.6%)       |         |          |                 |
|                        |        | GG | 1817 (58.8%)       |         |          |                 |

SNP: single nucleotide polymorphism; MAF: minor allele frequency; n: number of sample
